# Supplementary material for: Facile one-step synthesis of a 3D macroscopic SnO2–graphene aerogel and its application as a superior anode material for Li-ion batteries
Source: Royal Society of Chemistry journal article supplement (doi:10.1039/c3ra40873f), 2013-01-01
Supplement: c3ra40873f.pdf [file c3ra40873f.pdf]

## Supplementary Information

### 5 **Facile one-step synthesis of 3D macroscopic SnO<sub>2</sub>/graphene aerogel and its application as a superior anode material for Li-ion batteries**

**Junfei Liang, Yikan Liu, Lin Guo \* and Li-Dong Li \***

10 *Key Laboratory of Bio-Inspired Smart Interfacial Science and Technology of Ministry of Education, School of Chemistry & Environment, Beihang University, Beijing, 100191, P. R. China. E-mail: guolin@buaa.edu.cn, lilidong@buaa.edu.cn; fax:010-82338162; Tel.:010-82338162*

#### **Experimental Details**

##### 15 **Chemical reagents and materials**

Graphite powder (325 mesh, with purity >99.99%) was obtained from Alfa Aesar. All other chemicals (purchased from Beijing Chemical Co.,Ltd.) used in this experiment were analytical grade and were used without further purification.

##### **Preparation of SGA**

20 GO was synthesized from natural graphite powder by the modified Hummer's method as originally presented by Kovtyukhova et al.<sup>1</sup> The resulting solid graphite oxide was dispersed in water and subjected to dialysis for 7 days to completely remove metal ions and acids. In order to obtain GO nanosheets dispersed in water, the solution after dialysis was sonicated for 1 h with a frequency of 40 kHz (KH-500, Kunshan, Hechuang Ultrasonic Cleaner Inc.). Subsequently, the suspension of GO nanosheets was treated by high-speed centrifugation (4000rpm, 30min) to remove any undispersed solid, and afterwards, a brown homogeneous supernatant was collected.

25 In a typical synthesis of the SGA, we prepared a mixture of GO, SnCl<sub>2</sub> and HCl in a 20 mL cylindrical sampler vial with concentrations of 2 mg/ml, 0.004 and 0.08 M, respectively. The resulting mixture was reacted at 90°C for 1 h without stirring. Finally, the 3D black monolith was taken out, washed with distilled water, and freeze-dried into an aerogel for further characterizations and electrochemical measurements.

##### **2.3. Characterizations**

30 The structures and compositions of the as-prepared products were characterized by X-ray powder diffraction (XRD) using a Rigaku Dmax 2200 X-ray diffractometer with Cu K $\alpha$  radiation ( $\lambda=1.5416$  Å). The morphology of the as-prepared sample was investigated by JEOL JSM-7001F field-emission scanning electron microscope (FESEM). Transmission electron microscopy (TEM) and high-resolution TEM (HRTEM) investigations were carried out by a JEOL JEM-2100F microscope. The as-prepared samples were dispersed in ethanol and dropped onto a copper grid for the drying process in air. Raman spectrometer was recorded on a LabRAM HR800(HORIBA Jobin Yvon) confocal Raman spectrometer, with an excitation laser wavelength of 488.5 nm. All samples were deposited on silicon wafers in powder form without using any solvent. The XPS data were taken on an AXIS Ultra instrument from Kratos Analytical. The IR spectra were carried out through a Nicolet iN10 MX (Thermo Scientific) in the infrared domain 600-4000 cm<sup>-1</sup>

##### **2.4. Electrochemical measurements**

35 The electrochemical properties of the SGA as anode materials in lithium ion cells were evaluated by galvanostatic charge/discharge technique. The test electrodes were prepared by mixing 80 wt % active material with 10 wt % carbon black and 10 wt % polyvinylidene fluoride (PVDF) dissolved in N-methyl-2-pyrrolidone (NMP) to form a slurry, which was then coated onto a copper foil (current collector), dried at 80 °C for 10 h and finally pressed under pressure of 10 MPa. Afterwards, CR2016 type coin cells were assembled in an highly-pure argon-filled glovebox using the test electrodes, the metallic lithium counter/reference electrode, a polypropylene separator (Celgard 2400), an electrolyte of 1 mol/L LiPF<sub>6</sub> in ethylene carbonate and diethyl carbonate (EC/DMC, 1:1 vol) (Tianjin Jinniu Power Sources Material Co., Ltd. China). Charge-discharge measurements were carried out galvanostatically at a current density of 100 mA·g<sup>-1</sup> 45 in the voltage range of 0.005 V ~ 1.5 V using a battery test system (LAND CT2001A model, Wuhan Jinnuo Electronics. Ltd., China).

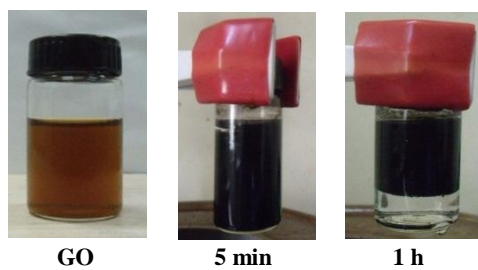

10 **Fig. S1** Photographs of the time-dependent formation process of the SGH

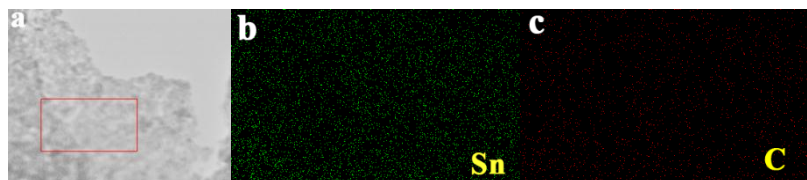

20 **Fig. S2** TEM image obtained from the SGA (a) with corresponding EDS maps for Sn (b) and C (c).

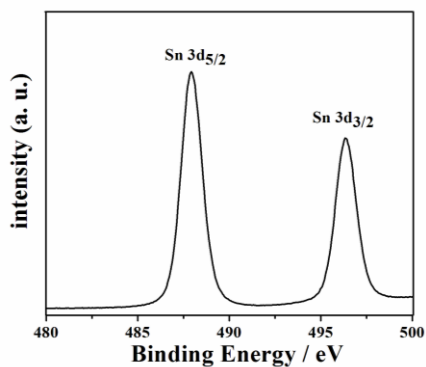

35 **Fig. S3** Sn 3d XPS spectrum of the SGA

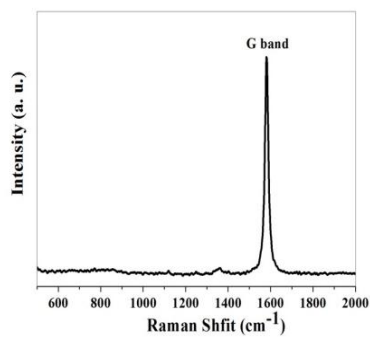

50 **Fig. S4** The Raman spectrum of graphite

**Table S1.** Summary of reversible specific capacities of SnO<sub>2</sub>/graphene composites reported previously and in our work.

|   | Current density<br>(mA g <sup>-1</sup> ) | Initial capacity<br>(mA h g <sup>-1</sup> ) | Cycle number<br>(n) | Residual capacity<br>(mA h g <sup>-1</sup> ) | Ref.     |
|---|------------------------------------------|---------------------------------------------|---------------------|----------------------------------------------|----------|
| 5 | 50                                       | 810                                         | 30                  | 670                                          | 10a      |
|   | 50                                       | 1080                                        | 30                  | 694                                          | 10b      |
|   | 156                                      | 786                                         | 50                  | 558                                          | 10c      |
|   | 55                                       | 765                                         | 100                 | 520                                          | 10e      |
|   | 200                                      | 541                                         | 35                  | 377                                          | 10f      |
|   | 67                                       | 978                                         | 30                  | 840                                          | 10h      |
|   | 100                                      | 819                                         | 50                  | 626                                          | 10i      |
|   | 100                                      | 690                                         | 20                  | 433                                          | 10k      |
|   | 10                                       | unknown                                     | 110                 | 625                                          | 10r      |
|   | 100                                      | 902                                         | 60                  | 602                                          | Our work |

## Reference

- 1 N. I. Kovtyukhova, P. J. Ollivier, B. R. Martin, T. E. Mallouk, S. A. Chizhik, E. V. Buzaneva and A. D. Gorchinskiy, *Chem. Mater.*, 1999, **11**, 771.
